# Supplementary material
Source: HighWire-hosted journal article supplement (https://bmjopen.bmj.com/content/12/1/e052283)
Supplement: inline-supplementary-material-2 [file inline-supplementary-material-2.pdf]

## APPENDIX 2

Predefined causes of interruptions, programmed on WOMBAT under dimension "Why", and examples when used.

| <b>Causes of interruptions</b> | <b>Examples of causes of interruptions</b>                                                                          |
|--------------------------------|---------------------------------------------------------------------------------------------------------------------|
| <b>Equipment</b>               | Malfunction, missing or wrong equipment<br>Change of OR table                                                       |
| <b>Related to procedure</b>    | Providing additional information<br>Contaminating sterile area<br>Surgeon asking for a change of patient's position |
| <b>Related to medication</b>   | Missing or wrong medication                                                                                         |
| <b>Change of shift</b>         | Changing staff for break or lunch during the procedure                                                              |
| <b>Alarm</b>                   | Alarm from devices or monitors                                                                                      |
| <b>External factor</b>         | External person entering the room to watch the procedure or to discuss test of new equipment                        |
| <b>Related to patient</b>      | Changing patient position<br>Changes in patient's vital signs                                                       |
| <b>Telephone/pager</b>         | Searching for surgeons<br>Planning for next procedure                                                               |
| <b>Other</b>                   | Tripping on iv-lines                                                                                                |
